# Supplementary material for: Complementary Keratoconus Indices Based on Topographical Interpretation of Biomechanical Waveform Parameters: A Supplement to Established Keratoconus Indices
Source: Hindawi journal article supplement (doi:10.1155/2017/5293573), 2017-01-01
Supplement: f1 [file 5293573.f1.pdf]

**Supplementary table:** Explanation of the 37 additional waveform parameters. *The different suffixes 1, 2, 11, 21 refer, respectively, to the upper 75% of the first (1) or second (2) peak, or to the upper 50% of the first (11) or the second (21) peak.*

|              | <b>Upper 75% of peak height</b> | <b>Upper 50% of peak height</b> |                                                                                                      |
|--------------|---------------------------------|---------------------------------|------------------------------------------------------------------------------------------------------|
| Area         | p1area<br>p2area                | p1area1<br>p2area1              | Area under peak 1 or peak 2                                                                          |
| Height       | h1<br>h2                        | h11<br>h21                      | Height from the lowest to the highest point in peak                                                  |
| width        | w1<br>w2                        | w11<br>w21                      | Width at the “base” of the peak region                                                               |
| Aspect ratio | aspect1<br>aspect2              | aspect11<br>aspect21            | Quotient of width to height                                                                          |
| Slope        | dslope1<br>dslope2              | dslope11<br>dslope21            | rate of decrease from base to peak<br>(downward slope)                                               |
|              | uslope1<br>uslope2              | uslope11<br>uslope21            | rate of increase from base to peak<br>(upward slope)                                                 |
| Slew rate    | slew1<br>slew2                  |                                 | Quotient of dive to width                                                                            |
|              | mslew1<br>mslew2                |                                 | maximum single increase in the rise of peak 1 and 2<br><br>(longest continuous line without a break) |
| Path         | path1<br>path2                  | path11<br>path21                | absolute value of path length around peak 1 and 2                                                    |
| Irregularity | aindex<br>bindex                |                                 | “smoothness” of peak 1, peak 2<br><br>number of times the peak changes direction                     |

|                |                |  |                                                                                                      |
|----------------|----------------|--|------------------------------------------------------------------------------------------------------|
| Dive           | dive1<br>dive2 |  | maximum single increase in the fall of peak 1 and 2<br><br>(longest continuous line without a break) |
| High frequency | aplhf          |  | high frequency “noise” in region between peaks                                                       |
